# Supplementary material for: In Vitro Cytotoxic and Inflammatory Response of Gingival Fibroblasts and Oral Mucosal Keratinocytes to 3D Printed Oral Devices
Source: MDPI journal article supplement (doi:10.3390/polym16101336), 2024-05-09
Supplement: s1 [file s1]

## SUPPLEMENTARY INFORMATION

Article: **In vitro cytotoxic and inflammatory response of gingival fibroblasts and oral mucosal keratinocytes to 3D printed oral devices**

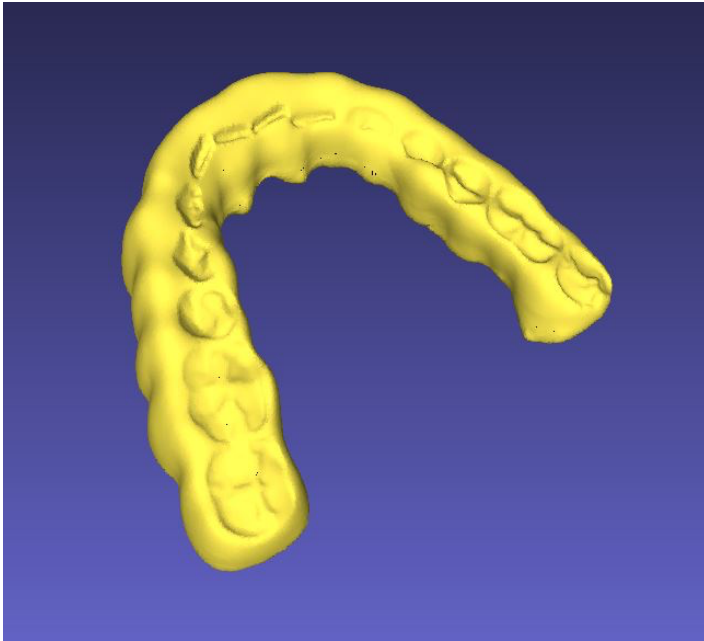

**Supplementary Figure S1.** STL data of the oral splint used for additive and subtractive manufacturing of the study specimens.
